# Supplementary material for: HIV testing in re-education through labour camps in Guangxi Autonomous Region, China (a cross-sectional survey)
Source: HighWire-hosted journal article supplement (doi:10.1136/sextrans-2014-051658), 2015-03-04
Supplement: sextrans-2014-051658supp_abstract_in_ChineseMandarin.pdf [file sextrans-2014-051658supp_abstract_in_ChineseMandarin.pdf]

## 在中国广西省劳改所的HIV检测横断面研究

目的：在中国劳教所，HIV检测是强制性的，但没有研究对其作过报道。

方法：我们在中国西南省份广西的三个劳教所进行了横断面研究。研究以面对面问卷方式进行，回应率为100%，有29人未成年，因此从研究中剔除。

结果：共有7 5 5劳改人员参与了问卷调查，7 2 5（9 6 %）人曾在劳改所里接受过血样测试，其中4 9 3（6 8 %）人认为这已包括了H I V检测。6 1位劳改人员自己报告为H I V感染者，他们感染情况与狱中的病历结果吻合。其中，5 3（8 7 %）人曾接受H I V阳性诊断后的健康教育，1 5（2 5 %）人正接受抗逆转病毒治疗。在7 2 5劳改人员中，共有2 3 3（3 2 %）人曾接受检测前的健康教育。本研究进一步对劳教人员对于其感染状态被告知和没被告知的反应和感受进行了报道。

结论：强制检测在劳改所里是相当普遍的，但有很大一部分劳改人员不知道其中包括了H I V检测。所有的劳改人员应该被告知他们的检测结果，以减少他们因此带来的心理压力和对他们感染情况的误解。劳改所提供了一个难得的机会让其劳改人员接受统一的检测和治疗以抑制H I V的蔓延。

---

This abstract has been translated and adapted from the original English-language content. Translated content is provided on an "as is" basis. Translation accuracy or reliability is not guaranteed or implied. BMJ is not responsible for any errors and omissions arising from translation to the fullest extent permitted by law, BMJ shall not incur any liability, including without limitation, liability for damages, arising from the translated text.
